# Supplementary material for: An efficient visible light-driven double-well-based Pt/CdS/3D-graphene heterostructure for electrocatalytic and photo-electrocatalytic methanol oxidation
Source: Royal Society of Chemistry journal article supplement (doi:10.1039/d4nj04462b), 2024-12-02
Supplement: d4nj04462b1.pdf [file d4nj04462b1.pdf]

## Supporting Document

### Efficient Visible Light Driven Double-Well Based Pt/CdS/3D-Graphene Heterostructure for Electrocatalytic and Photo-electrocatalytic Methanol Oxidation

Habib Ullah <sup>a, 1</sup>, Muqaddas Fatima Mumtaz <sup>a, 1</sup>, Asad Mumtaz <sup>a,\*</sup>, Hina Sajid <sup>b</sup>, Sani Zahra <sup>a</sup>, Sabahat Sardar <sup>c</sup>, Uzma Naz <sup>b</sup>, Qamir Ullah Niazi <sup>b</sup>, Shahid Iqbal <sup>c</sup>, Syed Farooq Adil <sup>d</sup>, Mohammad Rafe Hatshan <sup>d</sup>, Mujeeb Khan <sup>d</sup>, Jaweria Ambreen <sup>b</sup>, Muhammad Imran Irshad <sup>f</sup>, Muhammad Ahmad <sup>g</sup>

<sup>a</sup> Department of Chemistry, School of Natural Sciences, National University of Sciences and Technology, 44000, Islamabad, Pakistan

<sup>b</sup> Department of Chemistry, COMSATS University Islamabad, Park Road, 45550, Islamabad, Pakistan

<sup>c</sup> Research & Development Division, Al Qasim Traders, H-13, 44000, Islamabad, Pakistan

<sup>d</sup> Nottingham Ningbo China Beacons of Excellence Research and Innovation Institute, University of Nottingham Ningbo China, Ningbo 315100, China

<sup>e</sup> Department of Chemistry, College of Science, King Saud University, P.O. Box 2455, Riyadh 11451, Saudi Arabia

<sup>f</sup> Department of Physics, Khawaja Fareed University of Engineering and Information Technology (KFUEIT), Rahim Yar Khan, Pakistan

<sup>g</sup> Department of Chemistry, Division of Science and Technology, University of Education, 54770, Lahore, Pakistan

Corresponding Author: Asad Mumtaz

asad\_032@yahoo.com; asad.mumtaz@sns.nust.edu.pk

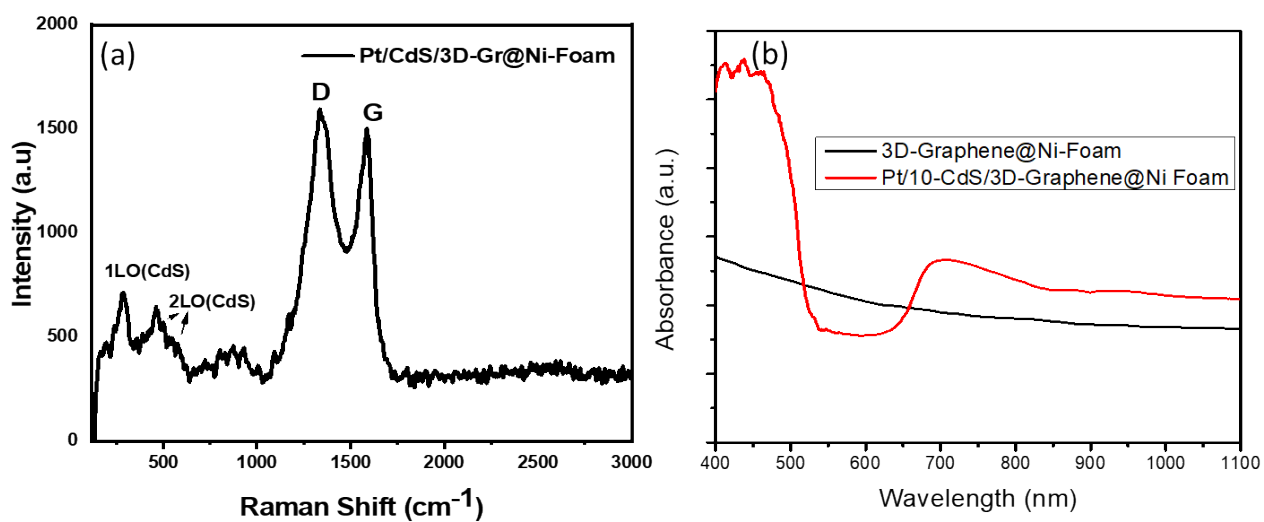

**Fig S1.** Raman Spectrum of (a) Pt/10-CdS/3D-Gr@Ni-Foam and UV-Visible spectra of (b) 3D-Gr@Ni-Foam and Pt/10-CdS/3D-Gr@Ni-Foam

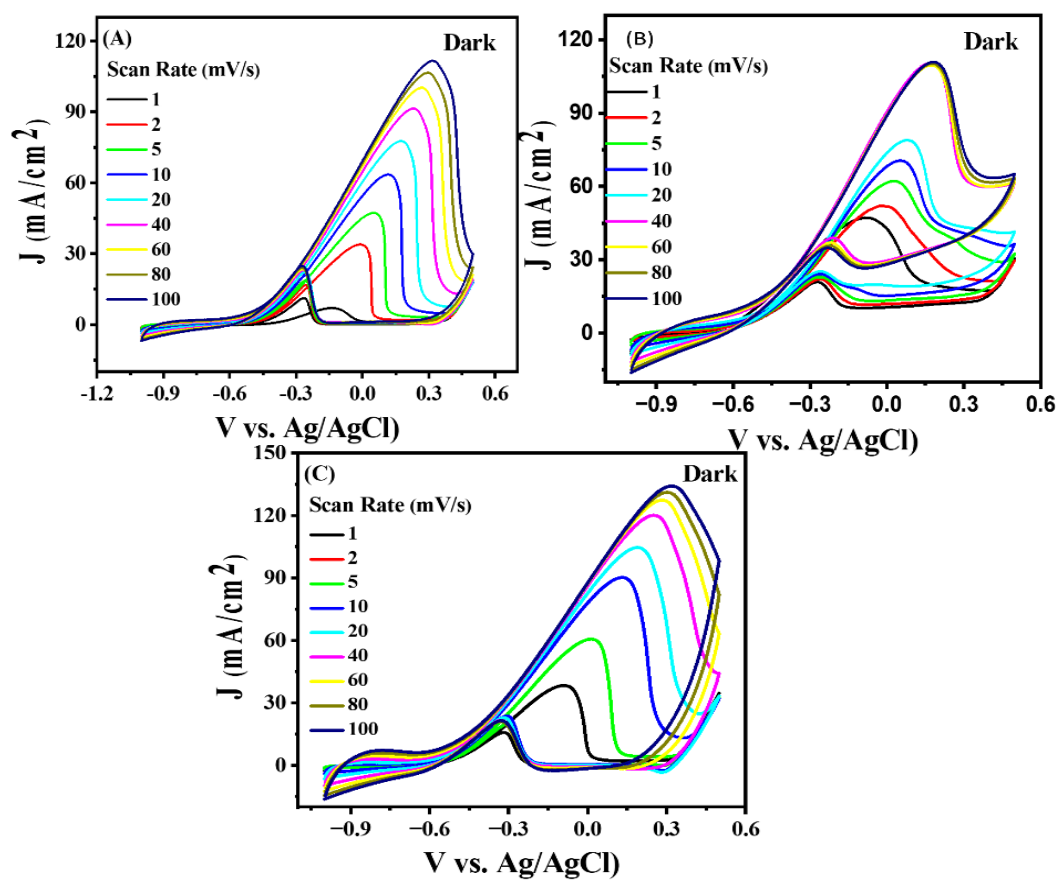

**Fig S2.** Cyclic Voltammogram of (A) Pt/Graphene@Ni-foam, (B) Pt/5-CdS/Graphene@Ni-foam (C) Pt/15-CdS/Graphene@Ni-foam

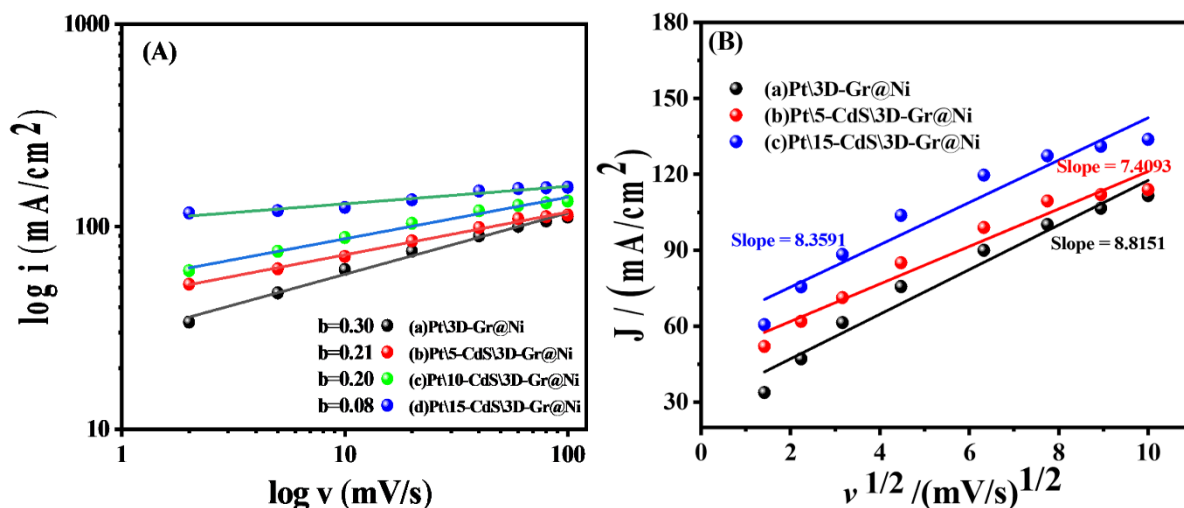

**Fig S3.** Cyclic Voltammetry (A) Plots of current density vs scan rates for values of “b” under dark for (a) Pt/Graphene@Ni-foam (b) Pt/5-CdS/Graphene@Ni-foam, (c) Pt/10-CdS/Graphene@Ni-foam (d) Pt/15-CdS/Graphene@Ni-foam (B) A graphical representation of the direct relationship of peak current density ( $I$ ) versus  $\sqrt{v}$  scan rate ( $v$ ) in 1 M CH<sub>3</sub>OH/1M KOH solution for (a) Pt/Graphene@Ni-foam (b) Pt/5-CdS/Graphene@Ni-foam, (c) Pt/15-CdS/Graphene@Ni-foam

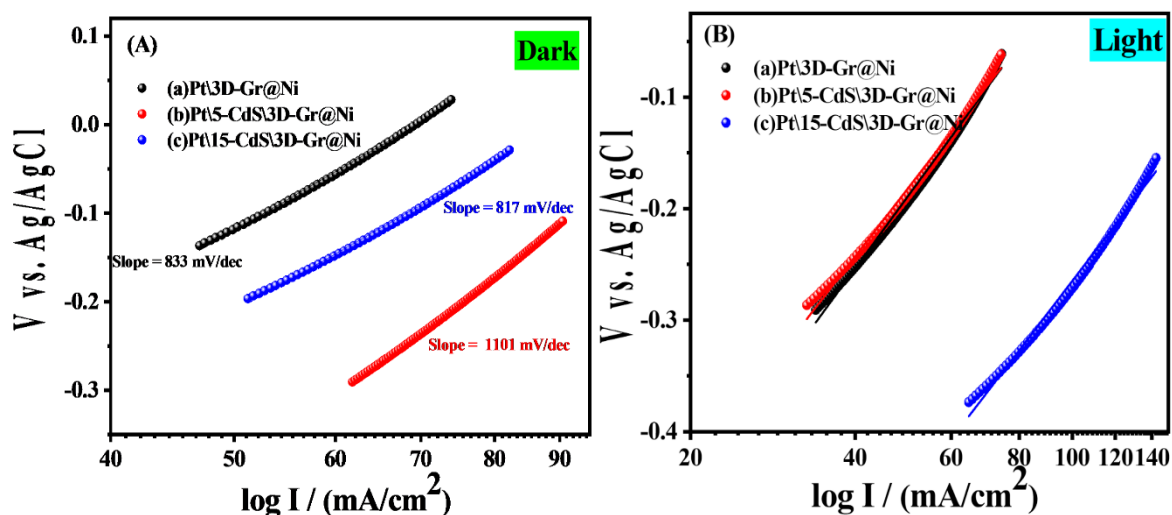

**Fig S4.** Current density Tafel plots in 0.5 M KOH + 0.5 M CH<sub>3</sub>OH at scan rate of 10 mV s<sup>-1</sup> for (a) Pt/Graphene@Ni-foam (b) Pt/5-CdS/Graphene@Ni-foam, (c) Pt/15-CdS/Graphene@Ni-foam (A) In Dark (B) in Light

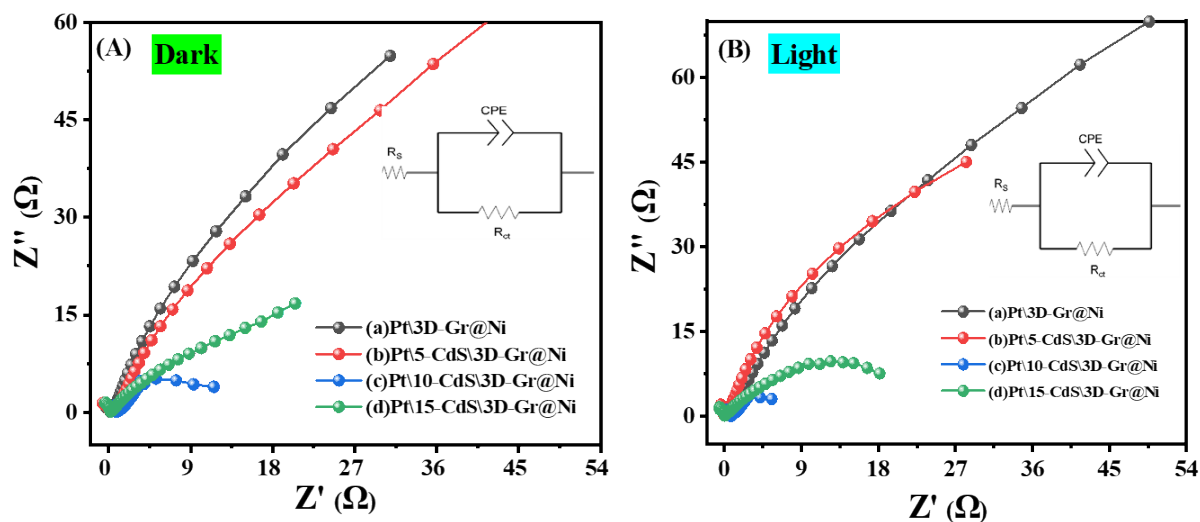

**Fig. S5** EIS Open Current Potential of Pt/Graphene@Ni-foam, Pt/x-CdS/Graphene@Ni-foam (A) Nyquist plot in Dark (B) Nyquist plot in Light

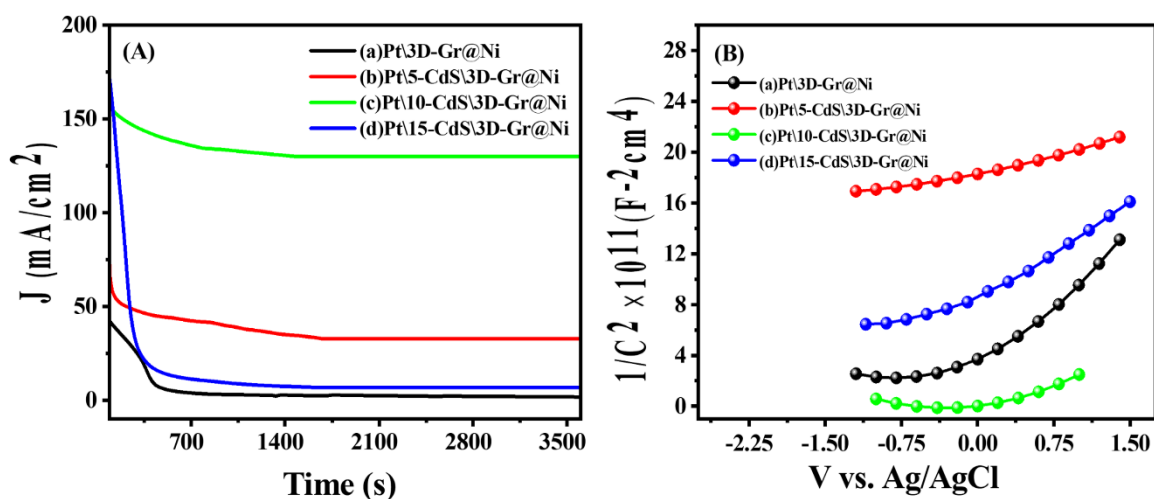

**Fig.S6** (A) Chronoamperometry plot (B) Flat band potential of (a) Pt/3D-Gr@Ni-Foam (b) Pt/5-CdS/3D-Gr@Ni-Foam, (c) Pt/10-CdS/3D-Gr@Ni-Foam (d) Pt/15-CdS/3D-Gr@Ni-Foam
